# Supplementary material for: Photocatalytic CO2 reduction of Ag/Ag2S/Ti3C2TX heterojunctions with enhanced interfacial charge transfer
Source: Royal Society of Chemistry journal article supplement (doi:10.1039/d4na00969j), 2024-12-30
Supplement: d4na00969j1.pdf [file d4na00969j1.pdf]

1

## Supporting Information

### 2 **Photocatalytic CO<sub>2</sub> Reduction of Ag/Ag<sub>2</sub>S/Ti<sub>3</sub>C<sub>2</sub>T<sub>x</sub> Heterojunctions** 3 **with Enhanced Interfacial Charge Transfer**

4 *Bo Zhang,<sup>a,b</sup> Yijun Chen,<sup>c</sup> Fei Li,<sup>\*b,d</sup> Yang Zhang,<sup>a</sup> Xiang Li,<sup>a</sup> Wuwan Xiong<sup>\*a</sup> and Weili*  
5 *Dai<sup>e</sup>*

6

7 <sup>a</sup> College of Environmental and Chemical Engineering, Zhaoqing University,  
8 Zhaoqing, 526061, P. R. China.

9 <sup>b</sup> The Key Lab of Pollution Control and Ecosystem Restoration in Industry Cluster  
10 Ministry of Education, South China University of Technology.

11 <sup>c</sup> School of Environment and Energy, South China University of Technology,  
12 Guangzhou 510006, P. R. China.

13 <sup>d</sup> School of Environmental Science and Engineering, Sun Yat-Sen University,  
14 Guangzhou, 510275, P. R. China.

15 <sup>e</sup> Key Laboratory of Jiangxi Province for Persistent Pollutants Control and Resources  
16 Recycle, Nanchang Hangkong University, Nanchang 330063, P. R. China

17

18

19

20

21

22

23

24

25

26

27

28 \*Corresponding authors. Tel.: +86(0)19860209331. E-mail: [lifei68@mail.sysu.edu.cn](mailto:lifei68@mail.sysu.edu.cn).

29 Tel.: +86(0)19860204540. E-mail: [19860204540@163.com](mailto:19860204540@163.com).

30

31 **Section S1.** Standard curves of methanol and ethanol

32       The methodology employed for the derivation of standard curves pertaining to  
33 organic alcohols, specifically methanol and ethanol, is delineated as follows: Standard  
34 solutions with concentrations of 0, 0.25, 0.5, 1.0, 2.0, 4.0, and 8.0 mg/L were  
35 meticulously prepared utilizing chromatographic grade methanol and ethanol,  
36 respectively. Subsequently, the aforementioned standard solutions were subjected to  
37 analysis via gas chromatography (Table S1). Concurrently, the standard curves for  
38 methanol and ethanol were constructed by plotting the concentration of the standard  
39 solution along the horizontal axis and the peak area, as detected by gas chromatography,  
40 along the vertical axis (Fig. S1). The derived standard curves, as well as their linear  
41 relationships, were subsequently analyzed.

42

43 **Table S1 Retention time and peak area of standard solutions of methanol and**  
 44 **ethanol**

| Methanol<br>concentration<br>(mg/L) | Retention<br>time<br>(min) | Peak area<br>(S) | Ethanol<br>concentratio<br>n (mg/L) | Retention<br>time<br>(min) | Peak area<br>(S) |
|-------------------------------------|----------------------------|------------------|-------------------------------------|----------------------------|------------------|
| 0                                   | -                          | -                | 0                                   | -                          | -                |
| 0.25                                | 5.055                      | 0.111            | 0.25                                | 5.425                      | 0.1587           |
| 0.5                                 | 5.056                      | 0.223            | 0.5                                 | 5.427                      | 0.3055           |
| 1                                   | 5.054                      | 0.502            | 1                                   | 5.422                      | 0.6316           |
| 2                                   | 5.052                      | 0.9784           | 2                                   | 5.428                      | 1.316            |
| 4                                   | 5.053                      | 2.177            | 4                                   | 5.429                      | 2.874            |
| 8                                   | 5.058                      | 4.375            | 8                                   | 5.423                      | 5.868            |

45

46 **Table S2 Yields of methanol and ethanol from photocatalytic CO<sub>2</sub> reduction over**  
47 **Ag/Ag<sub>2</sub>S with increasing irradiation time under visible light.**

| Reaction time | Methanol<br>( $\mu\text{mol g}_{\text{catal.}}^{-1}$ ) | Ethanol<br>( $\mu\text{mol g}_{\text{catal.}}^{-1}$ ) |
|---------------|--------------------------------------------------------|-------------------------------------------------------|
| 2h            | 12.43                                                  | 12.12                                                 |
| 4h            | 25.53                                                  | 16.93                                                 |

48

49

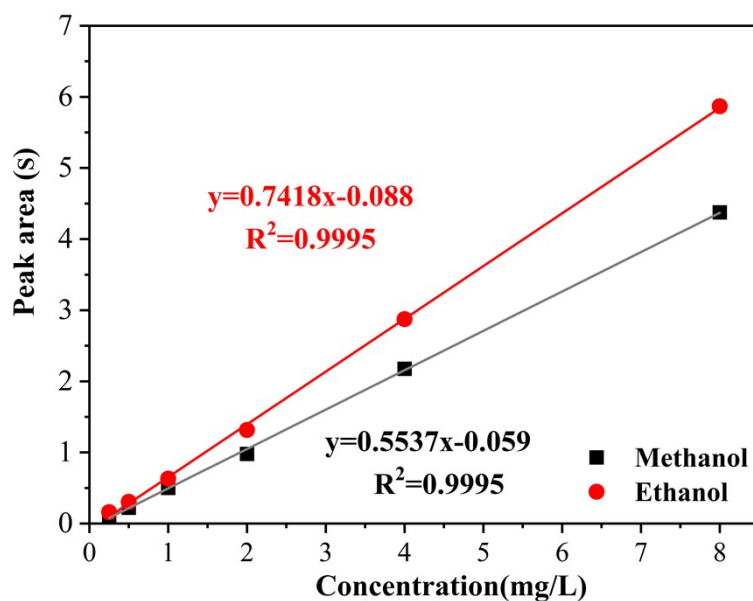

50

51

Figure S1 Standard curve of methanol and ethanol

52

It became evident that there existed a positive correlation between the

53

concentration of the standard solution and the peak area of the corresponding

54

chromatographic peaks, demonstrating a commendable degree of correlation. Upon

55

conducting an analysis of the regression line equation and the linear correlation

56

coefficient ( $R^2$ ) pertaining to the standard curve, the linear equations deduced for

57

methanol and ethanol manifest themselves as  $y=0.5537x-0.059$ ;  $y=0.7418x-0.088$

58

respectively. Two accompanying linear correlation coefficients were noted to be

59

$R^2=0.9995$ .

60

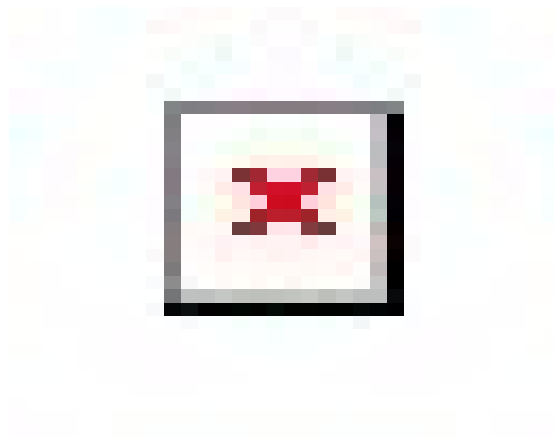

61

62 **Figure S2.** Pore size distributions of  $\text{Ag}_2\text{S}$ ,  $\text{Ti}_3\text{C}_2\text{T}_x$ , and  $\text{Ag}/\text{Ag}_2\text{S}/\text{Ti}_3\text{C}_2\text{T}_x$

63 composites.

64

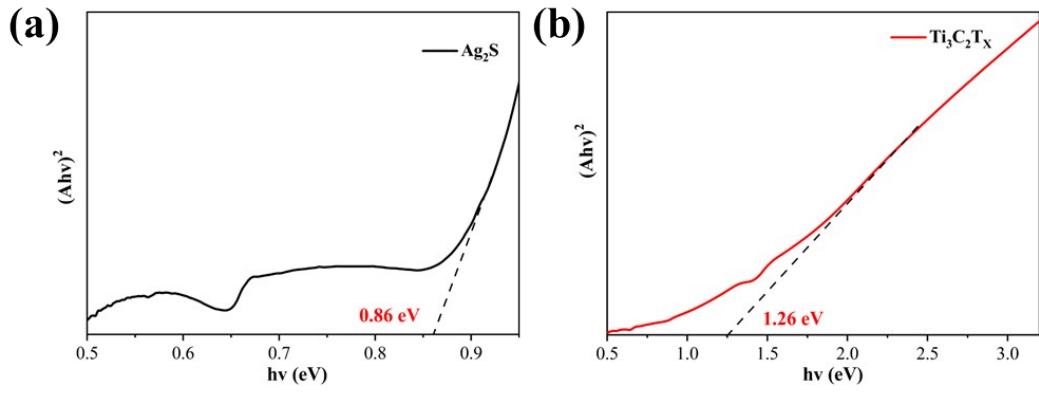

65

66 **Figure S3.** Plots of transformed Kubelka–Munk function  $(Ah\nu)^2$  vs light energy  $(h\nu)$

67 for  $\text{Ag}_2\text{S}$  and  $\text{Ti}_3\text{C}_2\text{T}_x$ .

68

69

70

71

72

73

74

75

76

77

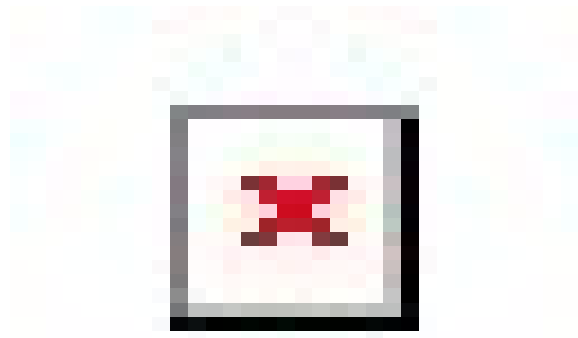

78

79 **Figure S4.** Photocurrent responses of  $\text{Ag}_2\text{S}$ ,  $\text{Ti}_3\text{C}_2\text{T}_x$ , and 7.5AAT composites.

80



81

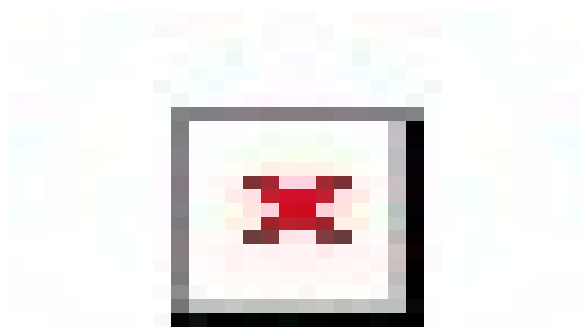

82

83 **Figure S5.** Total yield of methanol and ethanol obtained using 7.5AAT as the catalyst

84 for cycling runs.

85

86

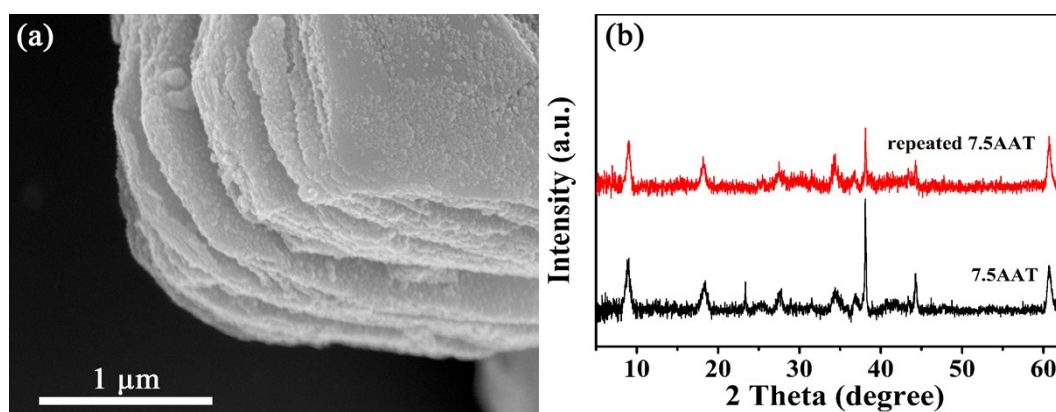

87

88 **Figure S6.** SEM images (a) and XRD patterns (b) of 7.5AAT composites after

89 photocatalytic  $\text{CO}_2$  reduction tests for five times.

90
